# Supplementary material for: A peptidylic inhibitor for neutralizing expanded CAG RNA-induced nucleolar stress in polyglutamine diseases
Source: PubMed Central journal article supplement — RNA. 2018 Apr;24(4):486–98. doi: 10.1261/rna.062703.117 (PMC5855950; doi:10.1261/rna.062703.117), 2018-04
Supplement: supp_062703.117_Supplemental_Fig_S1.pdf [file supp_062703.117_Supplemental_Fig_S1.pdf]

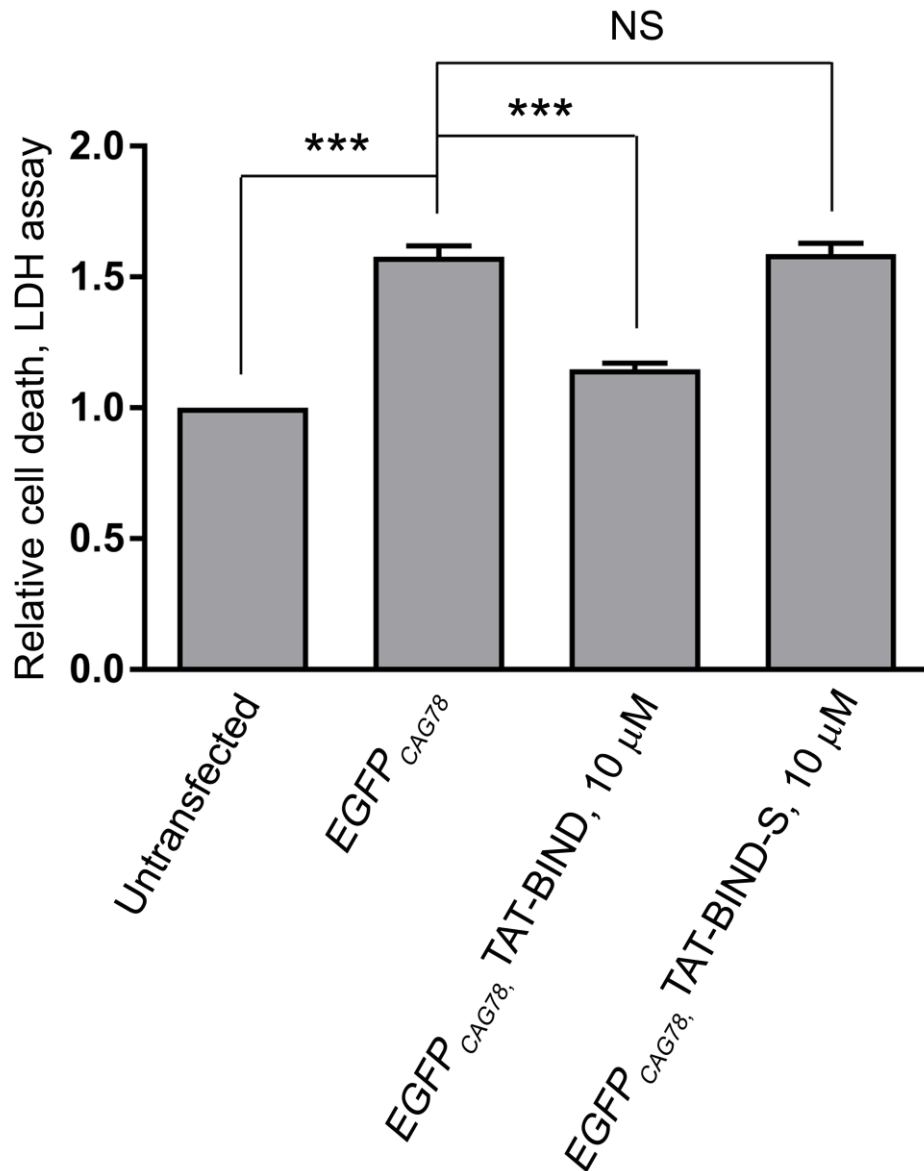

**Supplemental Figure S1. BIND suppressed cell death in *EGFP<sub>CAG78</sub>*-expressing HEK293 cells.** LDH assay was performed to detect the relative cell death level. Data were normalized to untransfected control and plotted as mean ± S.E.M. Experiments were repeated three times. \*\*\* indicates  $P < 0.001$ . NS indicates no significant difference was observed.
