# Supplementary material for: A peptidylic inhibitor for neutralizing expanded CAG RNA-induced nucleolar stress in polyglutamine diseases
Source: PubMed Central journal article supplement — RNA. 2018 Apr;24(4):486–98. doi: 10.1261/rna.062703.117 (PMC5855950; doi:10.1261/rna.062703.117), 2018-04
Supplement: supp_062703.117_Supplemental_Fig_S2.pdf [file supp_062703.117_Supplemental_Fig_S2.pdf]

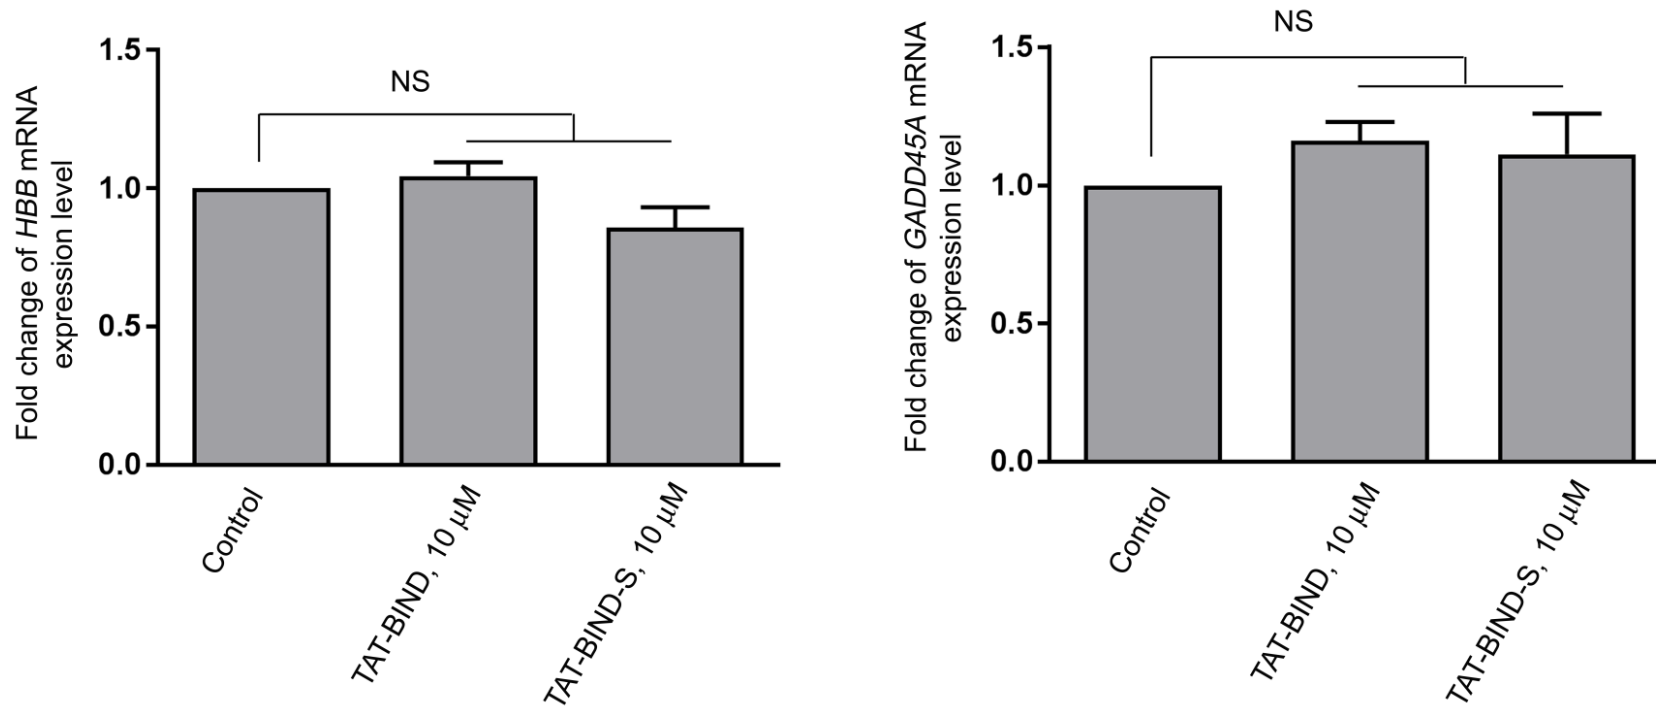

**Supplemental Figure S2. TAT-BIND/TAT-BIND-S did not alter *HBB* and *GADD45A* mRNA expression levels in HEK293 cells.**

Real-time PCR was performed to detect the expression level of *HBB* and *GADD45A* mRNA. Data were normalized to control and plotted as mean  $\pm$  S.E.M. Experiments were repeated three times. NS indicates no significant difference was observed.
