# Supplementary material for: A peptidylic inhibitor for neutralizing expanded CAG RNA-induced nucleolar stress in polyglutamine diseases
Source: PubMed Central journal article supplement — RNA. 2018 Apr;24(4):486–98. doi: 10.1261/rna.062703.117 (PMC5855950; doi:10.1261/rna.062703.117), 2018-04
Supplement: supp_062703.117_Supplemental_Fig_S4.pdf [file supp_062703.117_Supplemental_Fig_S4.pdf]

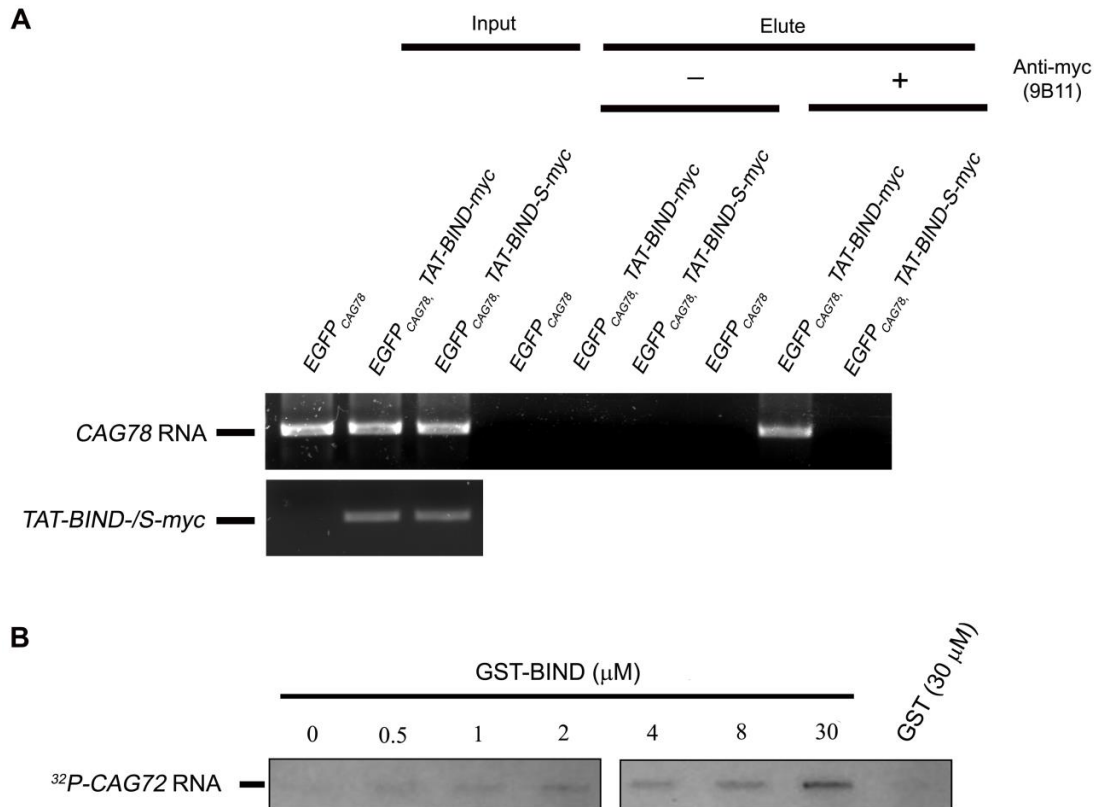

**Supplemental Figure S4. Interaction between BIND and expanded CAG RNA in HEK293 cells and *in vitro*.** (A) Protein/RNA interaction was performed on the lysate of HEK293 cells expressing *EGFP*<sub>CAG78</sub> with either *pcDNA3.1(+)-TAT-BIND-myc* or *pcDNA3.1(+)-TAT-BIND-S-myc* construct. TAT-BIND-myc or TAT-BIND-S-myc protein was immunoprecipitated with anti-myc antibody 9B11, followed by RT-PCR to determine the presence of CAG78 RNA. “+” indicates the presence of anti-myc antibody in the immunoprecipitants while “-” indicates that anti-myc antibody was not included. (B) *SCA2*<sub>CAG72</sub> RNA was <sup>32</sup>P-radiolabeled and incubated with different concentrations of GST-BIND. Free GST protein (30 μM) was used as negative control. Aliquots of the reactions were then blotted onto nitrocellulose membrane, washed with binding buffer, and the radioactivity of RNA retained on the filter was detected by auto-radiography. Experiments were repeated at least three times and only the representative gel images were shown.
