# Supplementary material for: A peptidylic inhibitor for neutralizing expanded CAG RNA-induced nucleolar stress in polyglutamine diseases
Source: PubMed Central journal article supplement — RNA. 2018 Apr;24(4):486–98. doi: 10.1261/rna.062703.117 (PMC5855950; doi:10.1261/rna.062703.117), 2018-04
Supplement: supp_062703.117_Supplemental_Fig_S5.pdf [file supp_062703.117_Supplemental_Fig_S5.pdf]

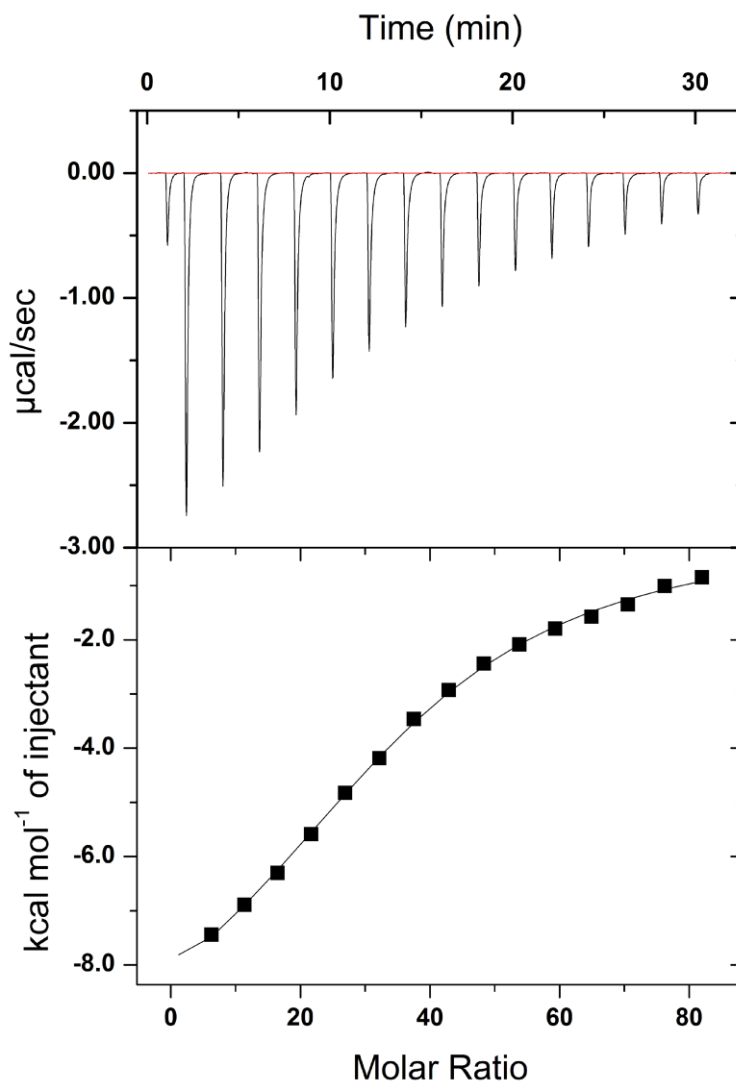

P3 to SCA2<sub>CAG72</sub> RNA

$$K_D = 35.55 \pm 7.31 \mu\text{M}$$

**Supplemental Figure S5. Binding affinity of P3 toward SCA2<sub>CAG72</sub> RNA.**

iTC study of the binding affinity of P3 (2 mM) to SCA2<sub>CAG72</sub> RNA (4  $\mu\text{M}$ ) was performed. The top panel shows the raw thermogram and the bottom panel shows the binding isotherm fitted to a single-site model. Experiments were repeated three times and plotted as mean  $\pm$  S.E.M..
