# Supplementary material for: A peptidylic inhibitor for neutralizing expanded CAG RNA-induced nucleolar stress in polyglutamine diseases
Source: PubMed Central journal article supplement — RNA. 2018 Apr;24(4):486–98. doi: 10.1261/rna.062703.117 (PMC5855950; doi:10.1261/rna.062703.117), 2018-04
Supplement: supp_062703.117_Supplemental_Fig_S6.pdf [file supp_062703.117_Supplemental_Fig_S6.pdf]

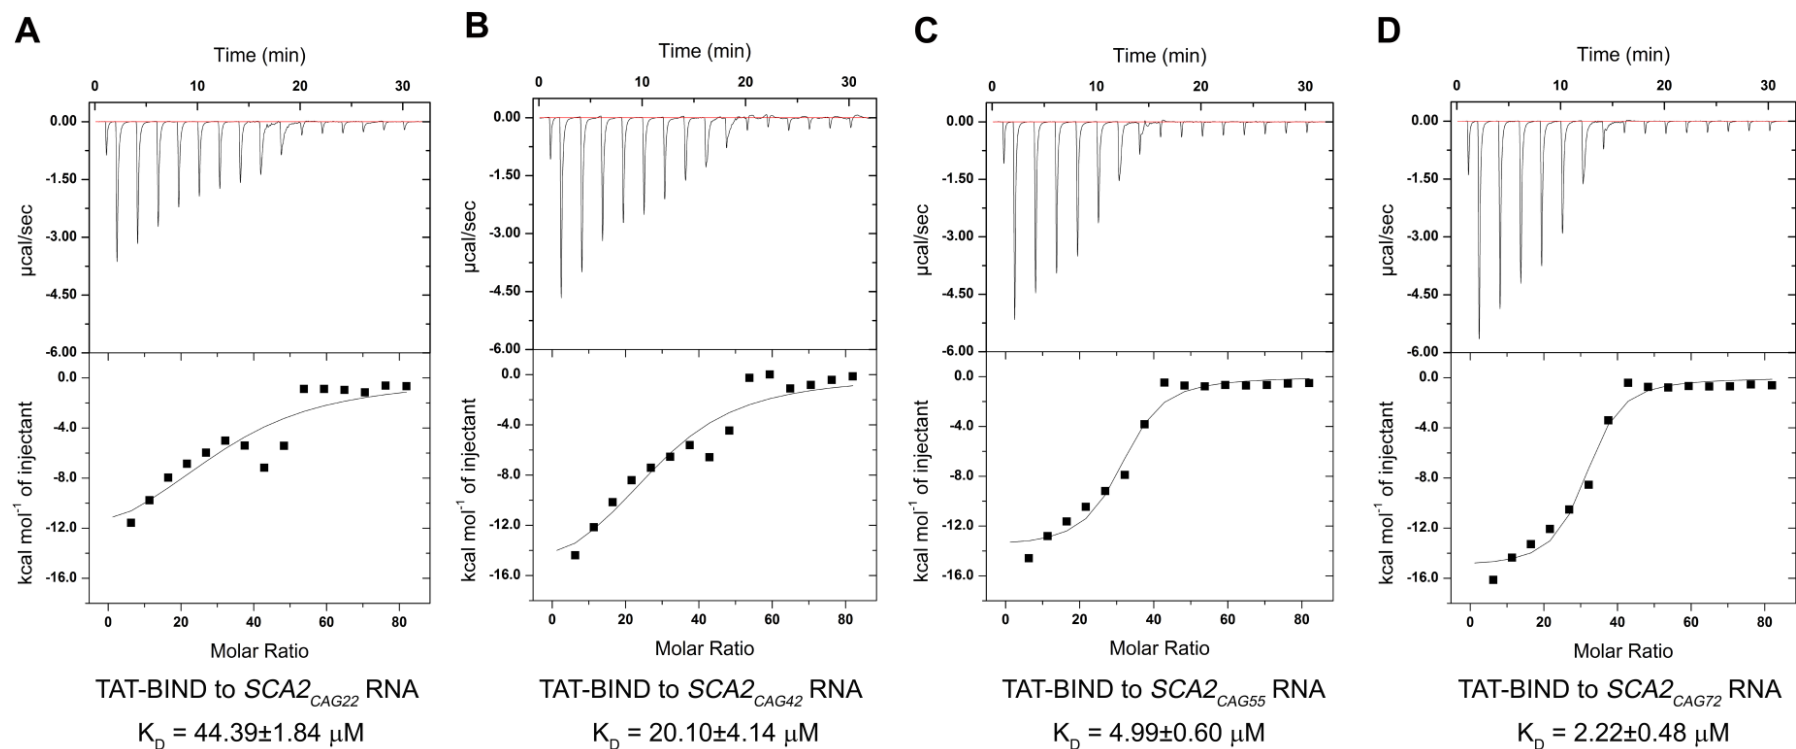

**Supplemental Figure S6. TAT-BIND directly interacted with CAG repeat-containing RNA in a length-dependent manner.** ITC studies of the binding affinity of TAT-BIND peptide (2 mM) to SCA2<sub>CAG22/42/55/72</sub> RNA (4  $\mu\text{M}$ ) were performed. The top panel shows the raw thermogram and the bottom panel shows the binding isotherm fitted to a single-site model. Experiments were repeated three times and plotted as mean  $\pm$  S.E.M..
