# Supplementary material for: A peptidylic inhibitor for neutralizing expanded CAG RNA-induced nucleolar stress in polyglutamine diseases
Source: PubMed Central journal article supplement — RNA. 2018 Apr;24(4):486–98. doi: 10.1261/rna.062703.117 (PMC5855950; doi:10.1261/rna.062703.117), 2018-04
Supplement: supp_062703.117_Supplemental_Fig_S7.pdf [file supp_062703.117_Supplemental_Fig_S7.pdf]

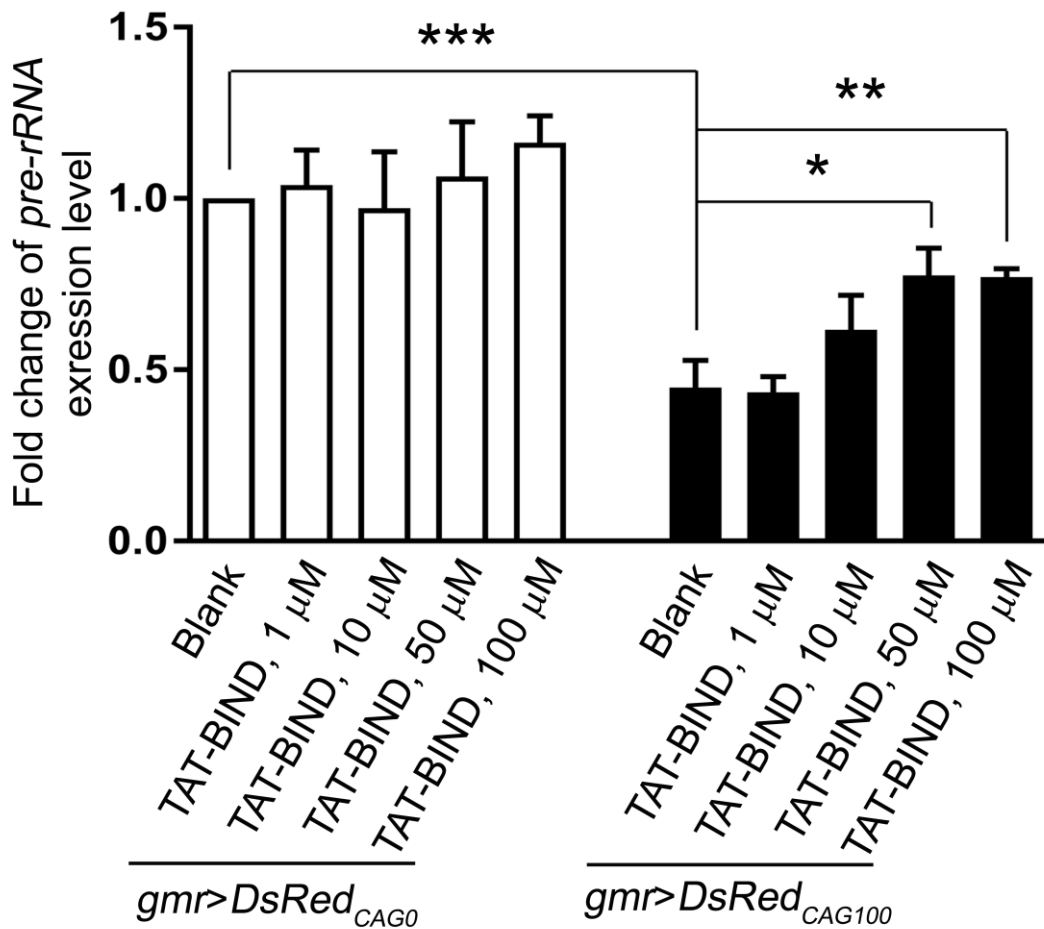

**Supplemental Figure S7. TAT-BIND suppressed expanded CAG RNA-induced nucleolar stress *in vivo*.** Dose-response effect of TAT-BIND on rescuing *pre-rRNA* expression level in *DsRed<sub>CAG100</sub>* *Drosophila*. Third instar larvae were treated with respective peptides dissolved in 2% sucrose solution for 2 hr at room temperature. RNA extraction was performed on 12 day-old adult flies. The genotypes of the flies were: *w; gmr-GAL4 UAS-DsRed<sub>CAG0</sub>/+; +/+* and *w; gmr-GAL4/+; UAS-DsRed<sub>CAG100</sub>/+*. Data were normalized to untransfected control and plotted as mean  $\pm$  S.E.M. Experiments were repeated at least three times. \* indicates  $P < 0.05$ , \*\* indicates  $P < 0.01$  and \*\*\* indicates  $P < 0.001$ .
