# Supplementary material for: A peptidylic inhibitor for neutralizing expanded CAG RNA-induced nucleolar stress in polyglutamine diseases
Source: PubMed Central journal article supplement — RNA. 2018 Apr;24(4):486–98. doi: 10.1261/rna.062703.117 (PMC5855950; doi:10.1261/rna.062703.117), 2018-04
Supplement: supp_062703.117_Supplemental_Fig_S8.pdf [file supp_062703.117_Supplemental_Fig_S8.pdf]

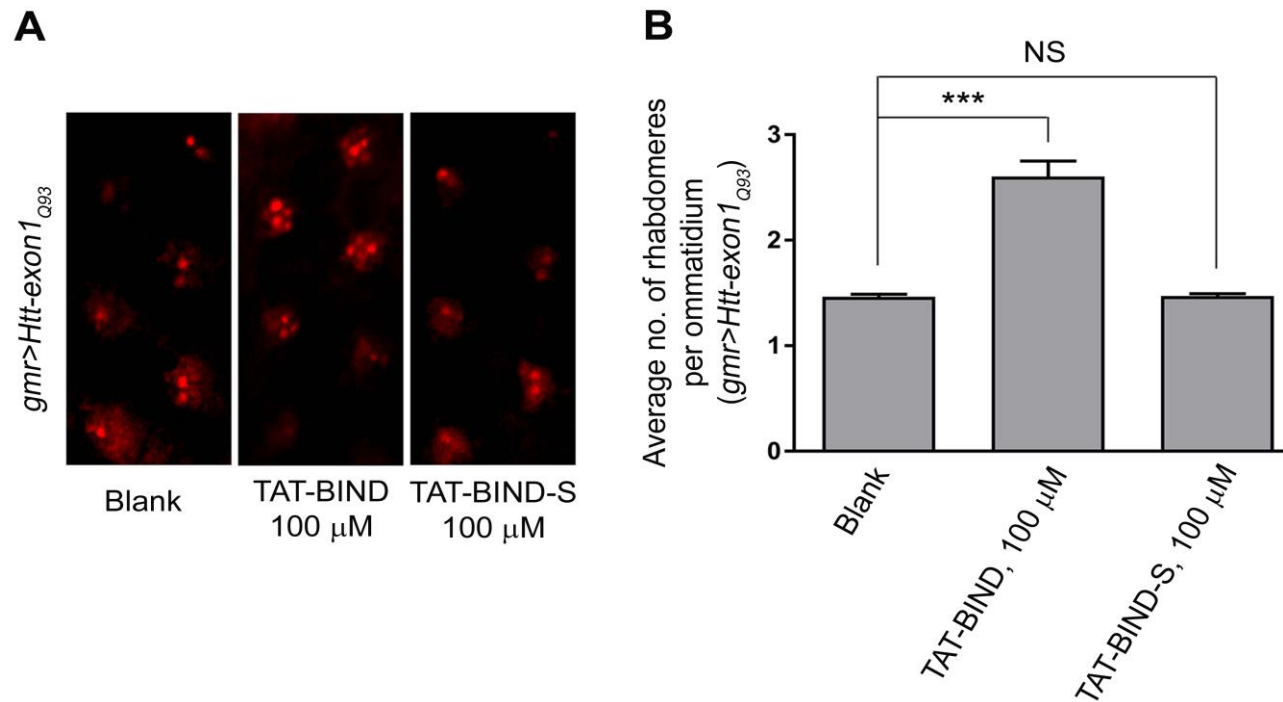

**Supplemental Figure S8. TAT-BIND suppressed neurodegeneration in HD disease models *in vivo*.** (A) Effect of TAT-BIND on suppressing neurodegeneration in *Htt-exon1<sub>Q93</sub>* *Drosophila*. (B) Statistical analysis of panel (A). Third instar larvae were treated with respective peptides dissolved in 2% sucrose solution for 2 hr at room temperature. Pseudopupil assay was performed on 1 day of *Htt-exon1<sub>Q93</sub>* adult flies. The genotypes of the flies were: *UAS-Htt-exon1<sub>Q93</sub>/+*; *gmr-GAL4/+*; *+/+*. Data are plotted as mean  $\pm$  S.E.M. Experiments were repeated at least three times. \*\*\* indicates  $P < 0.001$ . NS indicates no significant difference was observed.
