# Supplementary material for: A peptidylic inhibitor for neutralizing expanded CAG RNA-induced nucleolar stress in polyglutamine diseases
Source: PubMed Central journal article supplement — RNA. 2018 Apr;24(4):486–98. doi: 10.1261/rna.062703.117 (PMC5855950; doi:10.1261/rna.062703.117), 2018-04
Supplement: supp_062703.117_Supplemental_Table_1.pdf [file supp_062703.117_Supplemental_Table_1.pdf]

**Supplemental Table 1. Eight secondary structural components of BIND estimated by the BeStSel web server.**

|                                | Estimated content (%) |
|--------------------------------|-----------------------|
| Helix 1 (regular)              | 5.8                   |
| Helix 2 (distorted)            | 1.8                   |
| Antiparallel 1 (left-twisted)  | 0.0                   |
| Antiparallel 2 (relaxed)       | 0.0                   |
| Antiparallel 3 (right-twisted) | 36.2                  |
| Parallel                       | 0.0                   |
| Turn                           | 8.1                   |
| Others                         | 48.1                  |
